# Supplementary material for: The Screening of the Protective Antigens of Aeromonas hydrophila Using the Reverse Vaccinology Approach: Potential Candidates for Subunit Vaccine Development
Source: MDPI journal article supplement (doi:10.3390/vaccines11071266), 2023-07-21
Supplement: s1 [file s1]

# Supplemental material

**Table S1.** The sequence of the primers.

| Protein    | Name     | Sequences (5'-3')         |
|------------|----------|---------------------------|
| AJE34457.1 | 1-CDS-F  | GATAAACAGAAAATTGCGTAGCGG  |
|            | 1-CDS-R  | ATTCGTCGTCATCAAATAACCCCTT |
| AJE34471.1 | 2-CDS-F  | CTTAATAGGGAATCCGGTGAAAAT  |
|            | 2-CDS-R  | GCCTCGCTTTTTATCTTCTCTTAT  |
| AJE34515.1 | 3-CDS-F  | CAACAGATGGGATAACCTGATGGA  |
|            | 3-CDS-R  | AACACCGATTGGCTATATCAGAGG  |
| AJE34700.1 | 4-CDS-F  | ATCAGCTGATGTATGGCGCCAAAT  |
|            | 4-CDS-R  | ACCTTTTCTGGTCCTGGTTTCACG  |
| AJE34708.1 | 5-CDS-F  | AACTCCGCATTACATCCCTTTAT   |
|            | 5-CDS-R  | GAGGGGAGACCGAGGGTATTTTAT  |
| AJE35401.1 | 6-CDS-F  | CTGACACTTATGTGGATTTGATTG  |
|            | 6-CDS-R  | TCAATAGAAATCAGGACTGGCAAC  |
| AJE35595.1 | 7-CDS-F  | CTATGCTCTCGTCGTCGATAACAA  |
|            | 7-CDS-R  | CTCTGTTCTGTTGACTGGCATTAT  |
| AJE35662.1 | 8-CDS-F  | TATTCACCAAGCACAGCACCAAG   |
|            | 8-CDS-R  | ACGGTAAGATAACGCAAGGAGAGA  |
| AJE35814.1 | 9-CDS-F  | CTGGTGGGTTTGACAATAAAGAGG  |
|            | 9-CDS-R  | CATAACCAGATCCACGGGACCAAC  |
| AJE35877.1 | 10-CDS-F | CTGAGAGAACGATAAGCCAACAAT  |
|            | 10-CDS-R | TACTGCTCAGTCACATGCATCTTC  |
| AJE36112.1 | 11-CDS-F | CAGTGAGAGACAGATGAGCAGGAA  |
|            | 11-CDS-R | GGAATAACAATAACCCCGAGTCTG  |
| AJE36246.1 | 12-CDS-F | CAGAAACGGTCAATAACTGGCATA  |
|            | 12-CDS-R | TATTAGCAGCACATCACCCAGCAT  |
| AJE36247.1 | 13-CDS-F | AAATGCTGGGTGATGTGCTGCTAA  |
|            | 13-CDS-R | ATCTGCCTACAAGAGAGAACACTA  |
| AJE36909.1 | 14-CDS-F | TCCCCCCTTTCATCCCCTGTCTGC  |
|            | 14-CDS-R | TGAGGAATAAGCGGGGCCACGATC  |
| AJE37341.1 | 15-CDS-F | TGCCATCTCAACGAGGATTTTTTT  |
|            | 15-CDS-R | GAAACGATTTGACAGAAAGTGACG  |
| AJE37342.1 | 16-CDS-F | GAGTATCCAGGAACCATCTCTTTT  |
|            | 16-CDS-R | CCTCGTCGATGTCTGGTGTAGTAG  |
| AJE37343.1 | 17-CDS-F | CCTACTACACCAGACATCGACGAG  |
|            | 17-CDS-R | CTTGCTCACCACCTGTTGTTATCT  |
| AJE37434.1 | 18-CDS-F | TCACACTTACTCCTTGTTCCCTCA  |
|            | 18-CDS-R | CAGAGCATCAACAAGGACACATAA  |
| AJE37449.1 | 19-CDS-F | CGATAGACATCTTTACCAGTTTCA  |
|            | 19-CDS-R | TATTTTCGGTTGATTGTCATCGTAC |
| AJE37487.1 | 20-CDS-F | GCAATCGGATAAATAGCAAGCGTT  |
|            | 20-CDS-R | AGAAGCGTGATGATCTGCAGGAAA  |
| AJE37516.1 | 21-CDS-F | ATAACTATTGCGGACTGATACGGC  |
|            | 21-CDS-R | TTCGTGGAGCCTGTCTTGATTGTT  |
| AJE37629.1 | 22-CDS-F | CCTCCTCCTGGTTAGTGTGCAAT   |
|            | 22-CDS-R | AAACAGAGGGGCGTAGTGTAGAAC  |
| AJE37705.1 | 23-CDS-F | CTCGATGAATCCTGTCGTAAATG   |
|            | 23-CDS-R | CAACGTCTTCTTCATATCCATCTC  |
| AJE37778.1 | 24-CDS-F | GCTTCAGTTTCTATCAAGGTTTCGC |
|            | 24-CDS-R | TCAACATCTGACGGGCAATAAAAA  |
| AJE37804.1 | 25-CDS-F | GGCGTCCATCACCTTGTTTCAGTTC |
|            | 25-CDS-R | TGCTGGGTTGGCTCTGTATTGGTT  |
| AJE38163.1 | 26-CDS-F | CGGCCCTTTCACCAATTTGACATC  |
|            | 26-CDS-R | ATCTCCTCGTCGTGGTTCTGTTGA  |
| AJE38201.1 | 27-CDS-F | CTTGCCATTGTCGTAAGCAGTTTG  |
|            | 27-CDS-R | GGATGGAGATGTGTGTGCCGATAG  |

|            |          |                           |
|------------|----------|---------------------------|
| AJE38225.1 | 28-CDS-F | AGAGCCCACACAGGAAAGACAACA  |
|            | 28-CDS-R | GATGAGGCCAGTAGGGTGAGGTTG  |
| AJE38562.1 | 29-CDS-F | GGGCACCAATAATAAGAAATCAGA  |
|            | 29-CDS-R | AAACCAGAGACAAGAGTTCCATAA  |
| AJE34456.1 | 30-CDS-F | CAGAGCCGTCAGCAGAGTCAAATT  |
|            | 30-CDS-R | AGTGGAAACTGGTATGTTTCGCAAG |
| AJE34989.1 | 31-CDS-F | TTCCCGTCGCACTGGGTAAAATGA  |
|            | 31-CDS-R | ATGGGGACATCGTCATCAGCAGTT  |
| AJE35148.1 | 32-CDS-F | AAACCCCTTCTGAACGGATGTGTC  |
|            | 32-CDS-R | CAACAAGCCGTTTGAAATCAGCAG  |
| AJE37118.1 | 33-CDS-F | GCCTGAAATTAAACAGCGGAAACA  |
|            | 33-CDS-R | GACCATAGGGACAATAGAGCCACT  |
| AJE37120.1 | 34-CDS-F | GCCAAGGGAGTAGGTATGATTTCGG |
|            | 34-CDS-R | CTGCTCTCCCTGTGTGATGAAAGT  |
| AJE37322.1 | 35-CDS-F | TAACAAACAAGTACCGCTATCCCT  |
|            | 35-CDS-R | TTATTGTCAGTCCTTGTGTTTGGGT |
| AJE37560.1 | 36-CDS-F | GTCCATAAAATCAGGAGCAATACA  |
|            | 36-CDS-R | GTTTGCTAACTTCAACCACCTGCT  |
| AJE37735.1 | 37-CDS-F | CTCCCCGATATTCGCCGTACAGAA  |
|            | 37-CDS-R | TGCTCGACTCGCTCGGGATCTGAT  |
| AJE37742.1 | 38-CDS-F | GCAAATCGTCGTTACCGCCAATA   |
|            | 38-CDS-R | TTCTGCGAACCGAGTCCTATCCCG  |
| AJE38071.1 | 39-CDS-F | GCGTAGAGTTGAATCACTGACCGA  |
|            | 39-CDS-R | CAGCACCTGGTTACGCCATCTTC   |

Note: Starting from the CDS region of the 39 proteins, 210 bases were counted both forward and backward. Primers for 39 proteins were designed using Primer Premier 5.0 to ensure amplification of the intact CDS region.

**Table S2.** 24 strains of *Aeromonas* sp. were selected from the NCBI NR database.

| Species               | Strain Name         | Accession number |
|-----------------------|---------------------|------------------|
| <i>A. caviae</i>      | GSH8M-1             | AP019195.1       |
|                       | R25-6 chromosome    | CP025705.1       |
|                       | WP8-S17-ESBL-03     | AP022214.1       |
|                       | CYFY0630 chromosome | CP118442.1       |
|                       | Aero52 chromosome   | CP066813.1       |
|                       | BC02 chromosome     | CP102320.1       |
| <i>A. salmonicida</i> | A449                | CP000644.1       |
|                       | O23A chromosome     | CP021654.1       |
|                       | A527 chromosome     | CP022550.1       |
|                       | S44                 | CP022181.1       |
|                       | AS2 chromosome      | CP110652.1       |
|                       | FN1                 | CP101948.1       |
| <i>A. veronii</i>     | WP2-S18-CRE-03      | AP021940.1       |
|                       | B565                | CP002607.1       |
|                       | SW3814 chromosome   | CP083461.2       |
|                       | TH0426              | CP012504.1       |
|                       | AVNIH1              | CP014774.1       |
|                       | CB51 chromosome     | CP015448.1       |
| <i>A. hydrophila</i>  | KAM330              | AP023398.1       |
|                       | ML09-119            | CP005966.1       |
|                       | NJ-35               | CP006870.1       |
|                       | YL17                | CP007518.2       |
|                       | pc104A              | CP007576.1       |
|                       | AL09-71             | CP007566.1       |

Note: Twenty-four strains of *Aeromonas* species were selected from the NR database of NCBI.
